# Supplementary material for: Ultralow ruthenium modification of cobalt metal–organic frameworks for enhanced efficient bifunctional water splitting
Source: Royal Society of Chemistry journal article supplement (doi:10.1039/d3dt02712k), 2023-01-01
Supplement: d3dt02712k1.pdf [file d3dt02712k1.pdf]

## ***Supporting Information:***

### **Ultralow Ruthenium modification of Cobalt Metal–Organic Frameworks for Enhanced Efficient Bifunctional Water Splitting**

*Yuanyuan Wu*<sup>a,#</sup>, *Xuejiao Gu*<sup>a,#</sup>, *Wei Jiang*<sup>b</sup>, *Jihui Lang*<sup>c</sup>, *Yunchao Ma*<sup>a</sup>, *Yang Lu*<sup>d</sup>, *Xiaotian Yang*<sup>a\*</sup>, *Chunbo Liu*<sup>b\*</sup>, *Guangbo Che*<sup>a,e\*</sup>

<sup>a</sup> *Key Laboratory of Preparation Application of Environmental Friendly Materials, Ministry of Education, College of Chemistry, Jilin Normal University, Siping 136000, P. R. China*

<sup>b</sup> *Jilin Joint Technology Innovation Laboratory of Developing and Utilizing Materials of Reducing Pollution and Carbon Emissions, College of Engineering, Jilin Normal University, Siping, 136000, P. R. China.*

<sup>c</sup> *Key Laboratory of Functional Materials Physics and Chemistry of the Ministry of Education, Jilin Normal University, Changchun, 130103, China*

<sup>d</sup> *College of Mathematics and Computer, Jilin Normal University, Siping 13600, P. R. China*

<sup>e</sup> *College of Chemistry, Baicheng Normal University, Baicheng, 13700, P. R. China*

*\* Corresponding author: Xiaotian Yang (hanyxt@163.com ); Chunbo Liu (chunboliu@jlnu.edu.cn); Guangbo Che (guangboche@jlnu.edu.cn)*

*#The authors contributed equally to this work.*

## 1. Experimental section

### 1.1 Chemicals and reagents

Nickel foam (NF, 1.5 mm-thick, 200 × 300 mm) was purchased from Suzhou Keshenghe Metal Materials and was pretreated. Cobalt nitrate hexahydrate ( $\text{Co}(\text{NO}_3)_2 \cdot 6\text{H}_2\text{O}$ ), ruthenium trichloride hydrate ( $\text{RuCl}_3 \cdot x\text{H}_2\text{O}$ ), and 2-methylimidazole (Hmim) were purchased from Aladdin. Hydrochloric acid (HCl) was purchased from Sinopharm Chemical Reagent Co.

Treatment of foam nickel:

First, nickel foam was placed in a hydrochloric acid (1 M) solution and sonicated for 10 min. Thereafter, the material was washed twice with deionised water, placed in an absolute ethanol solution, and sonicated for 10 min. Subsequently, the foamed Ni was washed twice with deionised water, followed by ultrasonication in deionised water for 5 min. The oxides and pollutants on the surface of the nickel foam (1 cm × 6 cm) were removed, and the foam was dried at room temperature.

### 1.2 Synthesis of Co–MOF/NF

First, cobalt nitrate hexahydrate ( $\text{Co}(\text{NO}_3)_2 \cdot 6\text{H}_2\text{O}$ , 0.29 g) and dimethylimidazole (0.656 g) were dissolved in deionised water (20 mL). The solution was then mixed with dimethylimidazole in a cobalt nitrate solution and stirred for 5 min, after which the treated NF was immersed in the solution and stirred for 4 h to obtain Co–MOF/NF. The prepared Co–MOF/NF samples were sonicated three times in anhydrous ethanol, then washed three times with deionised water, and dried at 60 °C under vacuum for 6 h.

### 1.3 Synthesis of CoRu<sub>0.06</sub>–MOF/NF

First, cobalt nitrate hexahydrate ( $\text{Co}(\text{NO}_3)_2 \cdot 6\text{H}_2\text{O}$ , 0.29 mg), ruthenium trichloride hydrate ( $\text{RuCl}_3 \cdot x\text{H}_2\text{O}$ , 25 mg), and dimethylimidazole (0.656 mg) were dissolved in deionised water (20 mL). A Hmim solution was then poured into the mixed metal solution and stirred for 5 min, and the treated NF was immersed in the solution and stirred for 4 h to obtain CoRu<sub>0.06</sub>–MOF/NF. Finally, the CoRu<sub>0.06</sub>–MOF/NF samples

were sonicated three times with anhydrous ethanol, then washed three times with deionised water, and dried at 60 °C under vacuum for 6 h.

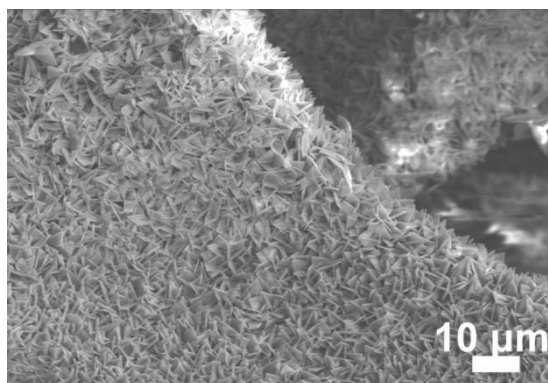

**Fig. S1.** SEM images of Co-MOF/NF.

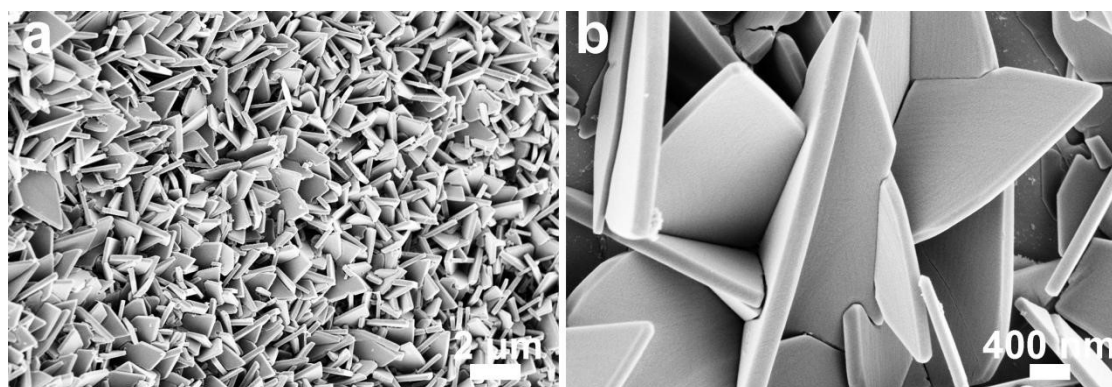

**Fig. S2.** (a,b) SEM images of CoRu<sub>0.06</sub>-MOF.

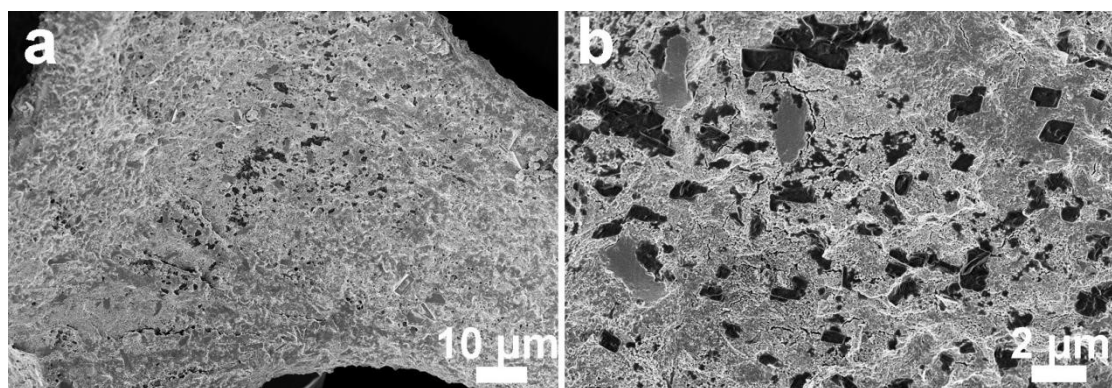

**Fig. S3.** (a,b) SEM image of CoRu<sub>0.06</sub>-MOF after OER.

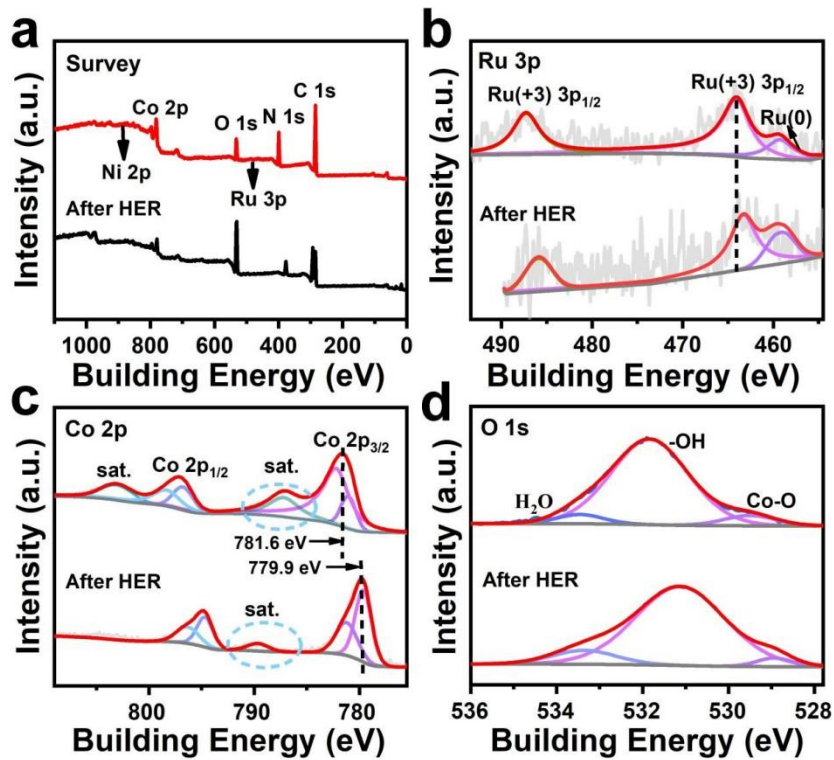

**Fig. S4.** (a) XPS measured spectra of CoRu<sub>0.06</sub>-MOF/NF, CoRu<sub>0.06</sub>-MOF/NF and Co-MOF/NF of (b) Ru 3p (c) Co 2p and (d) O1s in high resolution XPS spectra.

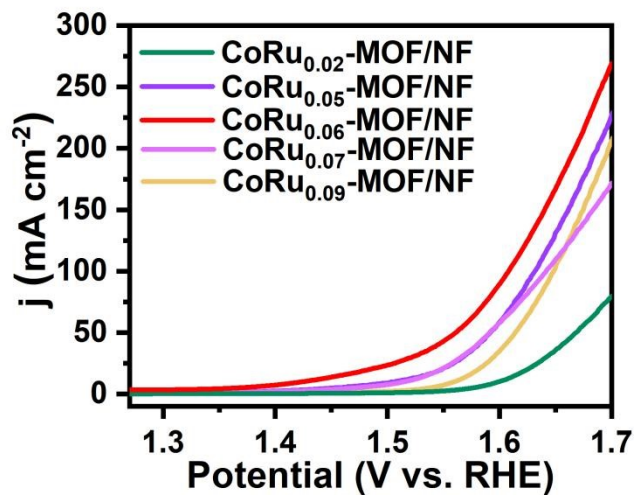

**Fig. S5.** LSV curves of OER test for catalysts with different Ru concentrations in alkaline media.

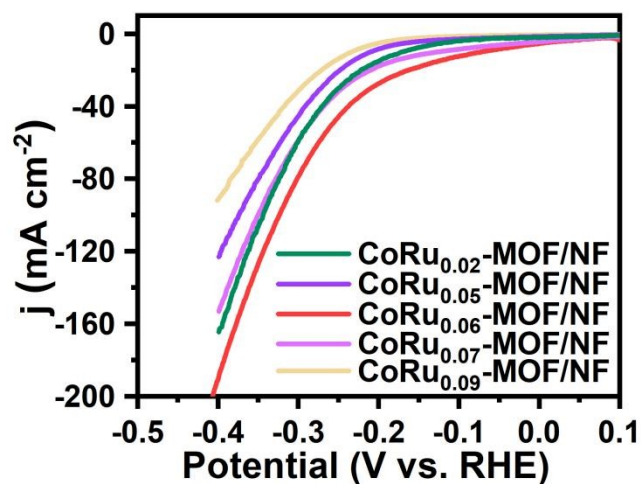

**Fig. S6.** LSV curves of HER test for catalysts with different Ru concentrations in alkaline media.

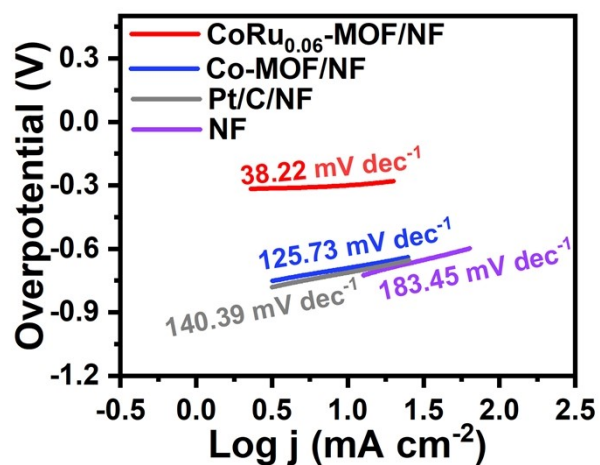

**Fig. S7.** Tafel slope plots of  $\text{CoRu}_{0.06}\text{-MOF/NF}$ ,  $\text{Co-MOF/NF}$ ,  $\text{RuO}_2\text{/NF}$  and  $\text{NF}$ .

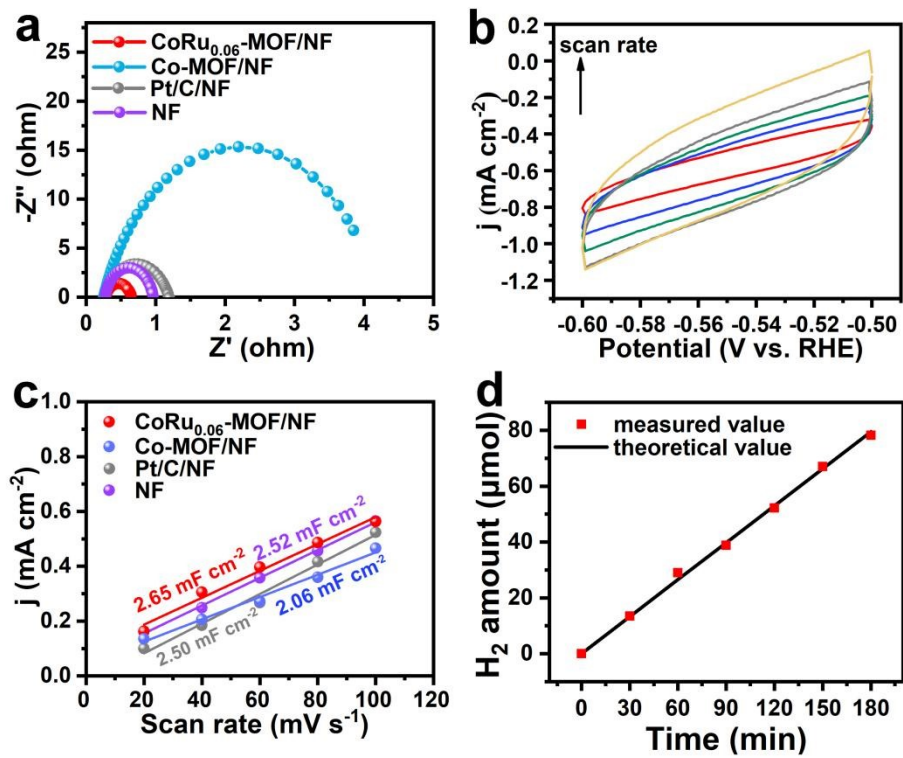

**Fig. S8.** (a) EIS Nyquist plots of CoRu<sub>0.06</sub>-MOF/NF, Co-MOF/NF, Pt/C/NF and NF. (b) Cyclic Voltammetry curves of CoRu<sub>0.06</sub>-MOF/NF. (c) The plots of the current density versus the scan rate of CoRu<sub>0.06</sub>-MOF/NF, Co-MOF/NF, RuO<sub>2</sub>/NF and NF. (d) Electrocatalytic efficiency of CoRu<sub>0.06</sub>-MOF/NF for HER at an overpotential of 10 mA cm<sup>-2</sup>.



**Table S1.** Comparison of the electrocatalytic performance of CoRu<sub>0.06</sub>-MOF/NF with some representative electrocatalysts reported recently for HER and OER.

| Catalyst                                    | Electrolyte solution | HER/OER | Current density (j)    | Overpotential ( $\eta$ ) | Stability test | Reference                                     |
|---------------------------------------------|----------------------|---------|------------------------|--------------------------|----------------|-----------------------------------------------|
| CoRu <sub>0.06</sub> -MOF/NF                | 1 M KOH              | HER     | 10 mA cm <sup>-2</sup> | 37 mV                    | 95 h           | This work                                     |
|                                             |                      | OER     |                        | 181 mV                   | 110 h          |                                               |
| Co-LDH@ZIF-67                               | 1 M KOH              | OER     | 10 mA cm <sup>-2</sup> | 187 mV                   | 50 h           | Adv. Sci., 2021, 8(2): 2002631                |
| Ru-NiSe <sub>2</sub> /NF                    | 1 M KOH              | HER     | 10 mA cm <sup>-2</sup> | 29 mV                    | 40 h           | Small, 2022,18 (6): 2105305                   |
|                                             |                      | OER     |                        | 210 mV                   | 25 h           |                                               |
| Ni <sub>1</sub> Co <sub>3</sub> @BC         | 1 M KOH              | OER     | 10 mA cm <sup>-2</sup> | 309 mV                   | 20 h           | Appl. Surf. Sci., 2020, 532, 147381.          |
| Ru-NiCoP/NF                                 | 1 M KOH              | HER     | 10 mA cm <sup>-2</sup> | 44 mV                    | 30 h           | Appl. Catal. B Environ., 2020, 279: 119396    |
|                                             |                      | OER     | 20 mA cm <sup>-2</sup> | 216 mV                   | 30 h           |                                               |
| Co(OH) <sub>2</sub> /Co-MOF                 | 1 M KOH              | OER     | 10 mA cm <sup>-2</sup> | 196 mV                   | 54000 s        | Chem. Eng. J., 2021, 408: 127319.             |
| CoNi-MOF                                    | 1 M KOH              | HER     | 10 mA cm <sup>-2</sup> | 110 mV                   | 20 h           | Adv. Mater. Interfaces, 2018, 5(21): 1800849. |
|                                             |                      | OER     |                        | 265 mV                   |                |                                               |
| Ru-Co <sub>3</sub> O <sub>4</sub> -NiO-NF   | 1 M KOH              | HER     | 10 mA cm <sup>-2</sup> | 44 mV                    | 60 h           | Chem. Eng. J., 2021, 426: 131300.             |
| MOF-Fe/Co                                   | 1 M KOH              | OER     | 10 mA cm <sup>-2</sup> | 238 mV                   | 50000 s        | Angew. Chem. Int. Ed., 2021, 60, 12097–12102  |
| Ni <sub>0.5</sub> Co <sub>0.5</sub> -MOF-74 | 1 M KOH              | OER     | 10 mA cm <sup>-2</sup> | 198 mV                   | 1800 s         | Nat. Energy, 2020, 5(11): 881-890.            |
| Ru-SAs/AC-FeCoNi                            | 1 M KOH              | OER     | 10 mA cm <sup>-2</sup> | 205 mV                   | 48 h           | Adv. Energy. Mater., 2021, 11(1): 2002816     |
